# Supplementary material
Source: PubMed Central journal article supplement (PMC9233088)
Supplement: NIHMS1811072-supplement-1.pdf [file NIHMS1811072-supplement-1.pdf]

# Conceptual model for perinatal depressive symptoms and cofactors

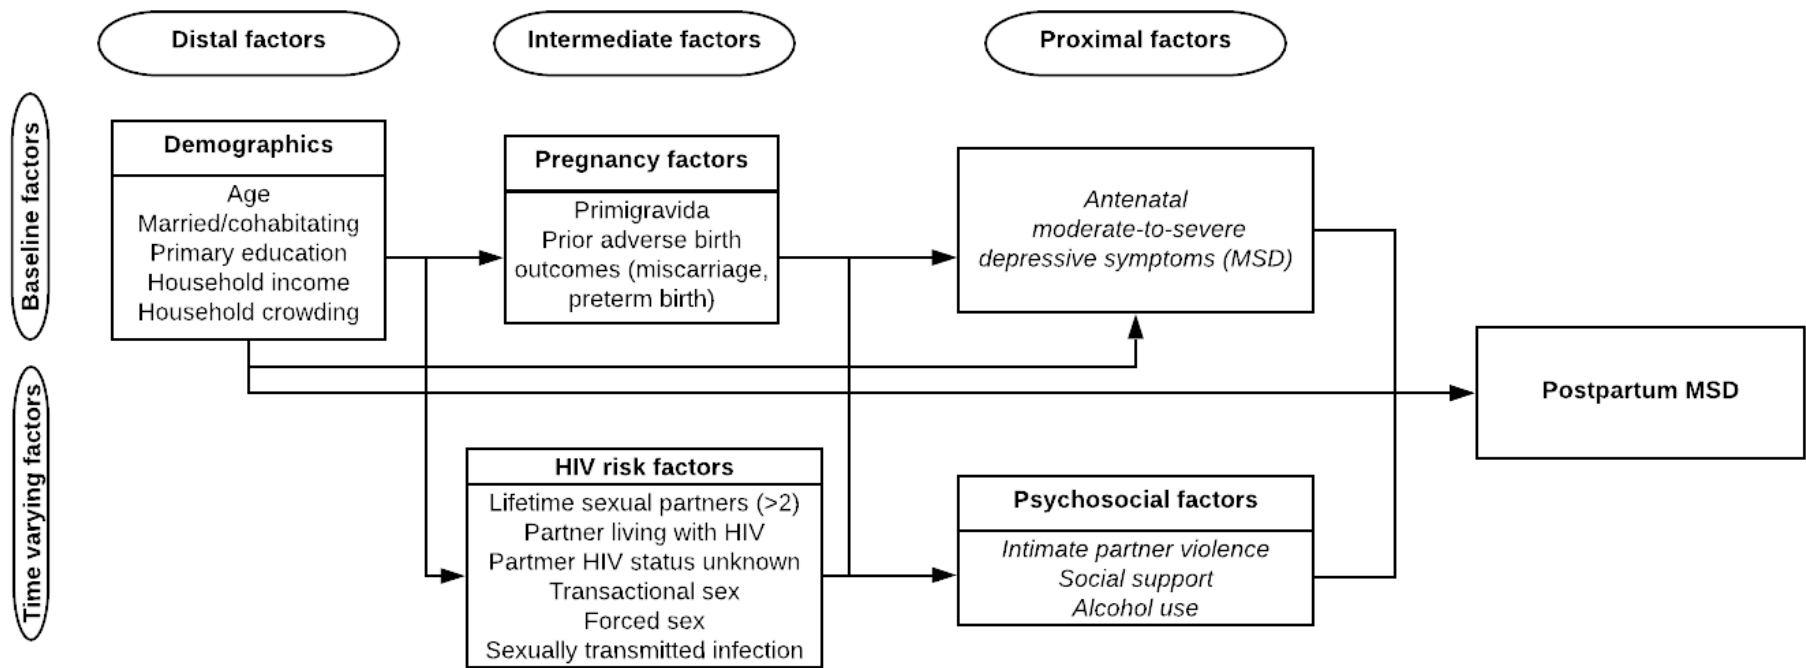

## Differences between women with depressive symptom information in pregnancy only, not postpartum

| Characteristics                                         | Depressive symptom information in pregnancy and postpartum (included in analysis) |                   | Depressive symptom data in pregnancy only (not included in analysis) |                   | p-value |
|---------------------------------------------------------|-----------------------------------------------------------------------------------|-------------------|----------------------------------------------------------------------|-------------------|---------|
|                                                         | N                                                                                 | n (%)             | N                                                                    | n (%)             |         |
| Age (years)                                             | 3553                                                                              | 24.0 (21.0, 28.7) | 327                                                                  | 23.1 (20.3, 27.0) | 0.006   |
| Gestational age at enrollment (weeks)                   | 3555                                                                              | 24.0 (20.0, 29.4) | 327                                                                  | 24.0 (20.0, 30.0) | 0.38    |
| Not married or not living with a partner                | 3522                                                                              | 501 (14.2%)       | 324                                                                  | 73 (22.5%)        | <0.001  |
| Regularly employed                                      | 3515                                                                              | 491 (14.0%)       | 320                                                                  | 56 (17.5%)        | 0.084   |
| Household crowding (>2 people/room)                     | 3529                                                                              | 1725 (48.9%)      | 324                                                                  | 133 (41.0%)       | 0.007   |
| Partner living with HIV                                 | 3507                                                                              | 144 (4.1%)        | 322                                                                  | 13 (4.0%)         | 0.95    |
| High HIV risk <sup>1</sup>                              | 3555                                                                              | 1257 (35.4%)      | 327                                                                  | 126 (38.5%)       | 0.25    |
| Social support score <sup>2</sup>                       | 3489                                                                              | 75.0 (62.0, 88.0) | 321                                                                  | 73.0 (60.0, 88.0) | 0.28    |
| Low social support <sup>2</sup> (MOS-SSS score <72)     | 3489                                                                              | 1330 (38.1%)      | 321                                                                  | 130 (40.5%)       | 0.40    |
| Intimate partner violence <sup>3</sup> (HITS score ≥10) | 3550                                                                              | 278 (7.8%)        | 326                                                                  | 28 (8.6%)         | 0.63    |
| Moderate-to-severe depressive symptoms (pregnancy)      | 3555                                                                              | 870 (24.5%)       | 327                                                                  | 83 (25.4%)        | 0.71    |

<sup>1</sup>We evaluated HIV risk using the Pintye et al.<sup>17</sup> risk score (high HIV risk: score >6 = “Yes”, score ≤6 = “No”).

<sup>2</sup>We evaluated social support using the 18-item Medical Outcomes Study social support score (MOS-SSS), defining low social support as scores below 72 (Low social support: MOS-SSS score <72 = “Yes”, MOS-SSS score ≥ 72 = “No”).

<sup>3</sup>We evaluated intimate partner violence using the 4-item Hurt, Insult, Threaten, and Scream scale (HITS), defining intimate partner violence as scores of 10 and above (IPV: HITS score ≥10 = “Yes”, HITS score <10 = “No”).

## Moderate-to-severe perinatal depressive symptoms by study visit

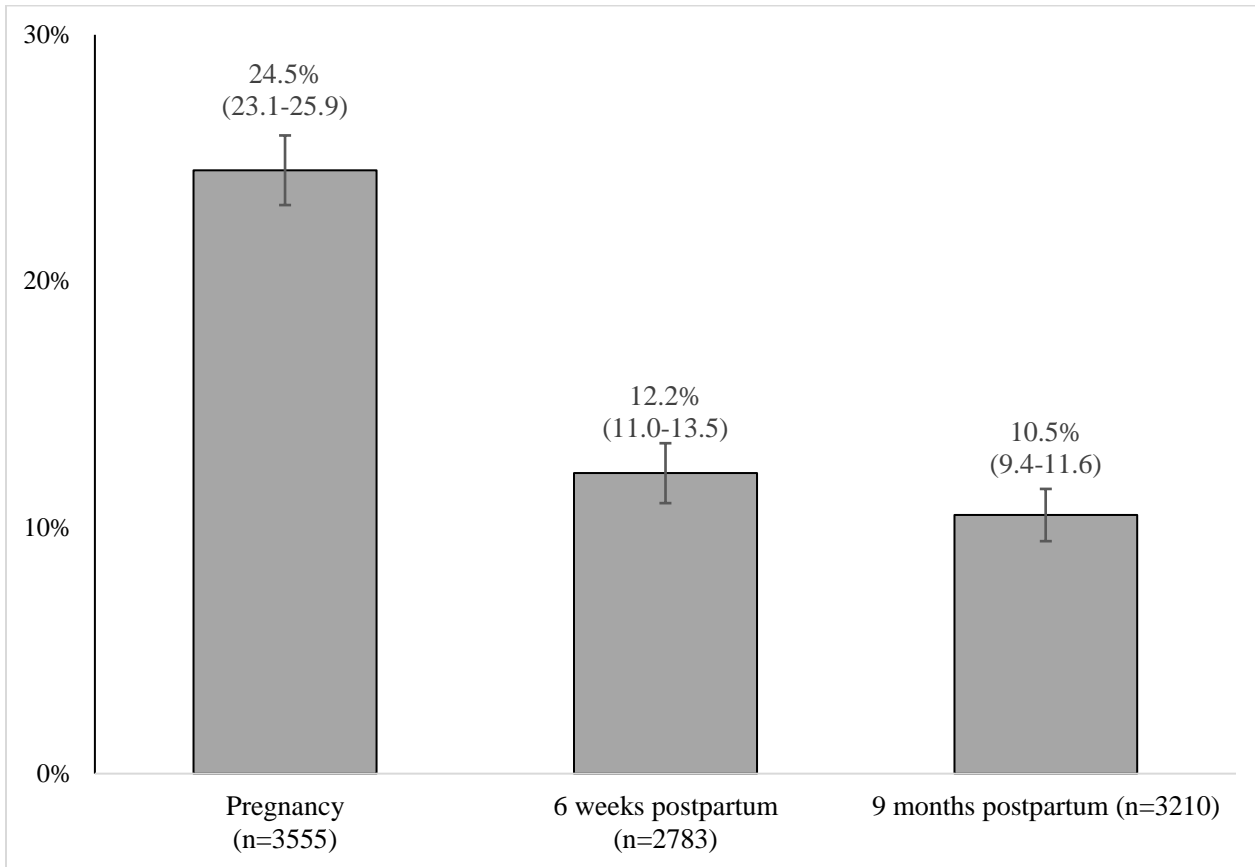

Among the 2438 women with depressive symptom data in all three time points, prevalence estimates were not meaningfully different. Pregnancy: 23.7% (579/2438), 6 weeks postpartum: 11.6% (284/2438), 9 months postpartum: 10.5% (255/2438). Line brackets on bar chart represent 95% confidence intervals.

**Moderate-to-severe depressive symptoms during pregnancy by PrIMA study site**

| <b>Facility</b>      | <b>N</b> | <b>n (%)</b> |
|----------------------|----------|--------------|
| Siaya facility 1     | 112      | 28 (25.0)    |
| Siaya facility 2     | 228      | 38 (16.7)    |
| Homa Bay facility 1  | 150      | 6 (4.0)      |
| Homa Bay facility 2  | 177      | 16 (9.0)     |
| Homa Bay facility 3  | 196      | 23 (11.7)    |
| Siaya facility 3     | 200      | 29 (14.5)    |
| Siaya facility 4     | 170      | 54 (31.8)    |
| Homa Bay facility 4  | 174      | 60 (34.5)    |
| Homa Bay facility 5  | 179      | 119 (66.5)   |
| Homa Bay facility 6  | 178      | 40 (22.5)    |
| Homa Bay facility 7  | 176      | 40 (22.7)    |
| Siaya facility 6     | 215      | 20 (9.3)     |
| Homa Bay facility 8  | 218      | 83 (38.1)    |
| Homa Bay facility 9  | 234      | 59 (25.2)    |
| Siaya facility 6     | 80       | 25 (31.3)    |
| Siaya facility 7     | 197      | 21 (10.7)    |
| Homa Bay facility 10 | 167      | 30 (18.0)    |
| Siaya facility 8     | 158      | 91 (57.6)    |
| Siaya facility 9     | 209      | 18 (8.6)     |
| Siaya facility 10    | 137      | 70 (51.1)    |
| Total                | 3555     | 870 (24.5)   |

## Correlates of MSD during pregnancy and predictors of postpartum MSD compared to no MSD ever from multivariable GEE models

|                                                         | Pregnancy (n=3041)                      |                  |                  | Postpartum (n=2567)                     |                  |                  |
|---------------------------------------------------------|-----------------------------------------|------------------|------------------|-----------------------------------------|------------------|------------------|
|                                                         | Multivariable GEE Analysis <sup>1</sup> |                  |                  | Multivariable GEE Analysis <sup>2</sup> |                  |                  |
|                                                         | aPR                                     | 95% CI           | p                | aRR                                     | 95% CI           | p                |
| <b>Baseline factors</b>                                 |                                         |                  |                  |                                         |                  |                  |
| Age (years)                                             | 1.00                                    | 0.99-1.01        | 0.749            | <b>1.03</b>                             | <b>1.01-1.05</b> | <b>0.007</b>     |
| Completed education (years)                             | 1.01                                    | 0.99-1.02        | 0.535            | <b>1.04</b>                             | <b>1.00-1.08</b> | <b>0.040</b>     |
| Household crowding (>2 people/room)                     | <b>1.14</b>                             | <b>1.01-1.29</b> | <b>0.041</b>     | 0.98                                    | 0.78-1.23        | 0.834            |
| Not married/living with a partner                       | <b>1.41</b>                             | <b>1.03-1.91</b> | <b>0.030</b>     | 1.33                                    | 0.95-1.84        | 0.095            |
| Gestational age at enrollment (weeks)                   | 1.01                                    | 0.99-1.02        | 0.330            |                                         |                  |                  |
| Multiparous                                             | 1.06                                    | 0.89-1.26        | 0.518            |                                         |                  |                  |
| Prior pregnancy loss                                    | 1.14                                    | 0.95-1.38        | 0.165            | 1.21                                    | 0.88-1.66        | 0.243            |
| Lifetime sexual partners ≥ 2                            | <b>1.36</b>                             | <b>1.11-1.66</b> | <b>0.003</b>     | <b>1.42</b>                             | <b>1.01-2.00</b> | <b>0.044</b>     |
| Partner HIV-positive                                    | <b>1.48</b>                             | <b>1.09-2.00</b> | <b>0.012</b>     |                                         |                  |                  |
| Partner HIV status unknown                              | <b>1.30</b>                             | <b>0.91-1.85</b> | 0.143            |                                         |                  |                  |
| Sexually transmitted infection                          | <b>1.30</b>                             | <b>0.99-1.70</b> | <b>0.057</b>     |                                         |                  |                  |
| Transactional sex                                       | 1.19                                    | 0.81-1.75        | 0.370            |                                         |                  |                  |
| Forced sex                                              | 1.12                                    | 0.72-1.74        | 0.619            |                                         |                  |                  |
| Ever drinks alcohol                                     | 1.09                                    | 0.72-1.65        | 0.682            | 1.30                                    | 0.84-2.01        | 0.232            |
| Low social support (MOS-SSS score <72)                  | <b>1.77</b>                             | <b>1.19-2.64</b> | <b>0.005</b>     |                                         |                  |                  |
| Intimate partner violence <sup>a</sup> (HITS score ≥10) | <b>1.84</b>                             | <b>1.44-2.35</b> | <b>&lt;0.001</b> |                                         |                  |                  |
| <b>Time-varying factors</b>                             |                                         |                  |                  |                                         |                  |                  |
| Intimate partner violence <sup>b</sup>                  |                                         |                  |                  | <b>2.47</b>                             | <b>1.72-3.56</b> | <b>&lt;0.000</b> |
| Low social support                                      |                                         |                  |                  | <b>2.83</b>                             | <b>2.30-3.49</b> | <b>&lt;0.001</b> |
| Time since delivery (days)                              |                                         |                  |                  | 1.00                                    | 1.00-1.00        | 0.893            |

<sup>1</sup>We estimated adjusted Prevalence Ratios (aPR) from a multivariable generalized estimating equation (GEE) with a Poisson family, log link, and independent correlation structure, clustered by facility with outcome of MSD in pregnancy (Y/N); Independent variables: Age (years), Not married/living with a partner (Y/N), Completed education (years), household crowding (Y/N), Gestational age at enrollment (Y/N), Multiparous (Y/N), Prior pregnancy loss (Y/N), Lifetime sexual partners >2 (Y/N), Partner living with HIV (Y/N), Partner HIV status unknown (Y/N), Transactional sex (Y/N), Forced sex (Y/N), Sexually transmitted infection (Y/N), Ever drinks alcohol (Y/N), Low social support (Y/N), IPV (Y/N).

<sup>2</sup>We estimated adjusted Relative Risks (aRR) from a multivariable generalized estimating equation (GEE) with a Poisson family, log link, and independent correlation structure, clustered by participant with outcome of MSD in postpartum only (Y/N); Independent variables: Age (years), Not married/living with a partner (Y/N), Completed education (years), household crowding (Y/N), Prior miscarriage (Y/N), Lifetime sexual partners >2 (Y/N), Ever drinks alcohol (Y/N), , low social support (time-varying [current visit], Y/N), intimate partner violence (time-varying [current visit], Y/N), time since delivery (days).

<sup>a</sup>We evaluated social support using the 18-item Medical Outcomes Study social support score (MOS-SSS), defining low social support as scores below 72 (Low social support: MOS-SSS score <72 = “Yes”, MOS-SSS score ≥ 72 = “No”)

<sup>b</sup>We evaluated intimate partner violence using the 4-item Hurt, Insult, Threaten, and Scream scale (HITS), defining intimate partner violence as scores of 10 and above (IPV: HITS score ≥10 = “Yes”, HITS score <10 = “No”)

**Model selection process for selected group-based trajectory model for perinatal depressive symptoms among Kenyan women**

|                                                                                                                                                                                                                                                 | <b>Bayesian Information Criterion (BIC)</b> | <b>Akaike Information Criterion (AIC)</b> | <b>Log Likelihood (LL)</b> |
|-------------------------------------------------------------------------------------------------------------------------------------------------------------------------------------------------------------------------------------------------|---------------------------------------------|-------------------------------------------|----------------------------|
| <b>Step 1: Identifying number of trajectory groups by best-fit model<sup>1</sup></b>                                                                                                                                                            |                                             |                                           |                            |
| Two trajectory groups                                                                                                                                                                                                                           | -26900.7                                    | -26851.4                                  | -26835.4                   |
| Three trajectory groups                                                                                                                                                                                                                         | -26867.0                                    | -26793.0                                  | -26769.0                   |
| Four trajectory groups                                                                                                                                                                                                                          | -26747.1                                    | -26648.4                                  | -26616.4                   |
| Five trajectory groups <sup>2</sup>                                                                                                                                                                                                             | -26720.4                                    | -26597.1                                  | -26557.1                   |
| <b>Step 2: Identifying polynomial form of each trajectory group by best-fit model<sup>2</sup></b>                                                                                                                                               |                                             |                                           |                            |
| Model selected based on BIC value:<br>Group 1 (“no depressive symptoms): linear<br>Group 2: (“Resolving MSD”) quadratic<br>Group 3: (“Chronic mild symptoms”) quadratic<br>Group 4: (“Persistent MSD”) cubic<br>Group 5: (“Emergent MSD”) cubic | -26648.8                                    | -26525.5                                  | -26485.5                   |

<sup>1</sup>We compared BIC for each of the four models in Step 1 and selected the 5-trajectory model since it had the most optimal BIC value. All trajectory groups were initially modeled using cubic polynomials. We used the extension for non-random attrition to relax assumptions of missingness completely at random.

<sup>2</sup>We ran all model permutations for 5-trajectories with polynomial forms (linear – quadratic) and selected the best fitting model using BIC. We used the extension for non-random attrition to relax assumptions of missingness completely at random.

**Model adequacy characteristics for selected group-based trajectory model for perinatal depressive symptoms among Kenyan women**

|                                                                                              | <b>Group 1: “no depressive symptoms”</b><br>n=372 | <b>Group 2: “Resolving MSD”</b><br>n=139 | <b>Group 3: “Chronic mild symptoms”</b><br>n=2709 | <b>Group 4: “Persistent MSD”</b><br>n=295 | <b>Group 5: “Emergent MSD”</b><br>n=40 |
|----------------------------------------------------------------------------------------------|---------------------------------------------------|------------------------------------------|---------------------------------------------------|-------------------------------------------|----------------------------------------|
| Proportion in each group based on assignments for maximum posterior probability <sup>1</sup> | 10.46%                                            | 3.91%                                    | 76.20%                                            | 8.30%                                     | 1.13%                                  |
| Expected proportion in each group based on sums of posterior probabilities <sup>1</sup>      | 13.14 %                                           | 4.75%                                    | 71.65%                                            | 9.30%                                     | 1.16%                                  |
| Average posterior probabilities <sup>2</sup>                                                 | 71.88%                                            | 77.07%                                   | 87.90%                                            | 78.32%                                    | 90.83%                                 |

<sup>1</sup>We achieved model adequacy since the proportion based on maximum posterior probability and expected proportion based on sums of posterior probabilities are within <5% of each other.

<sup>2</sup>We achieved model adequacy since average posterior probability in each group was  $\geq 70\%$ .

**Predictors of perinatal depressive symptoms trajectory group membership: results from multivariable multinomial logistic regression**

|                                   | Emergent MSD vs.<br>No depressive symptoms<br>(n=40) |                 |              | Resolving MSD vs.<br>No depressive symptoms<br>(n=139) |                 |                  | Persistent MSD vs.<br>No depressive symptoms<br>(n=295) |                |                  |
|-----------------------------------|------------------------------------------------------|-----------------|--------------|--------------------------------------------------------|-----------------|------------------|---------------------------------------------------------|----------------|------------------|
|                                   | aOR <sup>1</sup>                                     | 95% CI          | P            | aOR                                                    | 95% CI          | p                | aOR                                                     | 95% CI         | p                |
| Older adults (>24 years)          | <b>2.2</b>                                           | <b>1.1-4.4</b>  | <b>0.034</b> | 1.1                                                    | 0.7-1.7         | 0.593            | 1.3                                                     | 0.9-1.8        | 0.168            |
| Not married/living with a partner | 2.2                                                  | 0.8-5.8         | 0.122        | 2.5                                                    | 1.4-4.5         | 0.001            | 1.6                                                     | 1.0-2.6        | 0.065            |
| Household crowding                | 0.8                                                  | 0.4-1.5         | 0.456        | 1.6                                                    | 1.1-2.4         | 0.024            | 1.3                                                     | 0.9-1.8        | 0.133            |
| High HIV risk                     | 1.0                                                  | 0.5-2.1         | 0.902        | <b>1.7</b>                                             | <b>1.1-2.6</b>  | <b>0.010</b>     | <b>1.8</b>                                              | <b>1.3-2.5</b> | <b>0.001</b>     |
| Prior pregnancy loss              | 1.6                                                  | 0.6-4.1         | 0.340        | 1.7                                                    | 0.9-3.1         | 0.095            | <b>1.9</b>                                              | <b>1.2-3.1</b> | <b>0.011</b>     |
| Low social support                | 1.4                                                  | 0.7-2.8         | 0.366        | <b>1.9</b>                                             | <b>1.3-2.9</b>  | <b>0.003</b>     | <b>5.3</b>                                              | <b>3.8-7.5</b> | <b>&lt;0.001</b> |
| Intimate partner violence         | <b>4.0</b>                                           | <b>1.4-11.4</b> | <b>0.009</b> | <b>6.2</b>                                             | <b>3.1-12.3</b> | <b>&lt;0.001</b> | <b>3.5</b>                                              | <b>1.8-6.5</b> | <b>&lt;0.001</b> |

<sup>1</sup>We estimated adjusted odds ratios (aOR) from a multivariable multinomial logistic regression model with outcome: trajectory groups from group-based trajectory model; independent variables: older age (>24 years) (Y/N), Not married/living with a partner (Y/N), Household crowding (Y/N), High HIV risk (Y/N), Prior pregnancy loss (Y/N), Low social support (Y/N), Intimate partner violence (Y/N).



## Profiles of perinatal depressive symptom group members

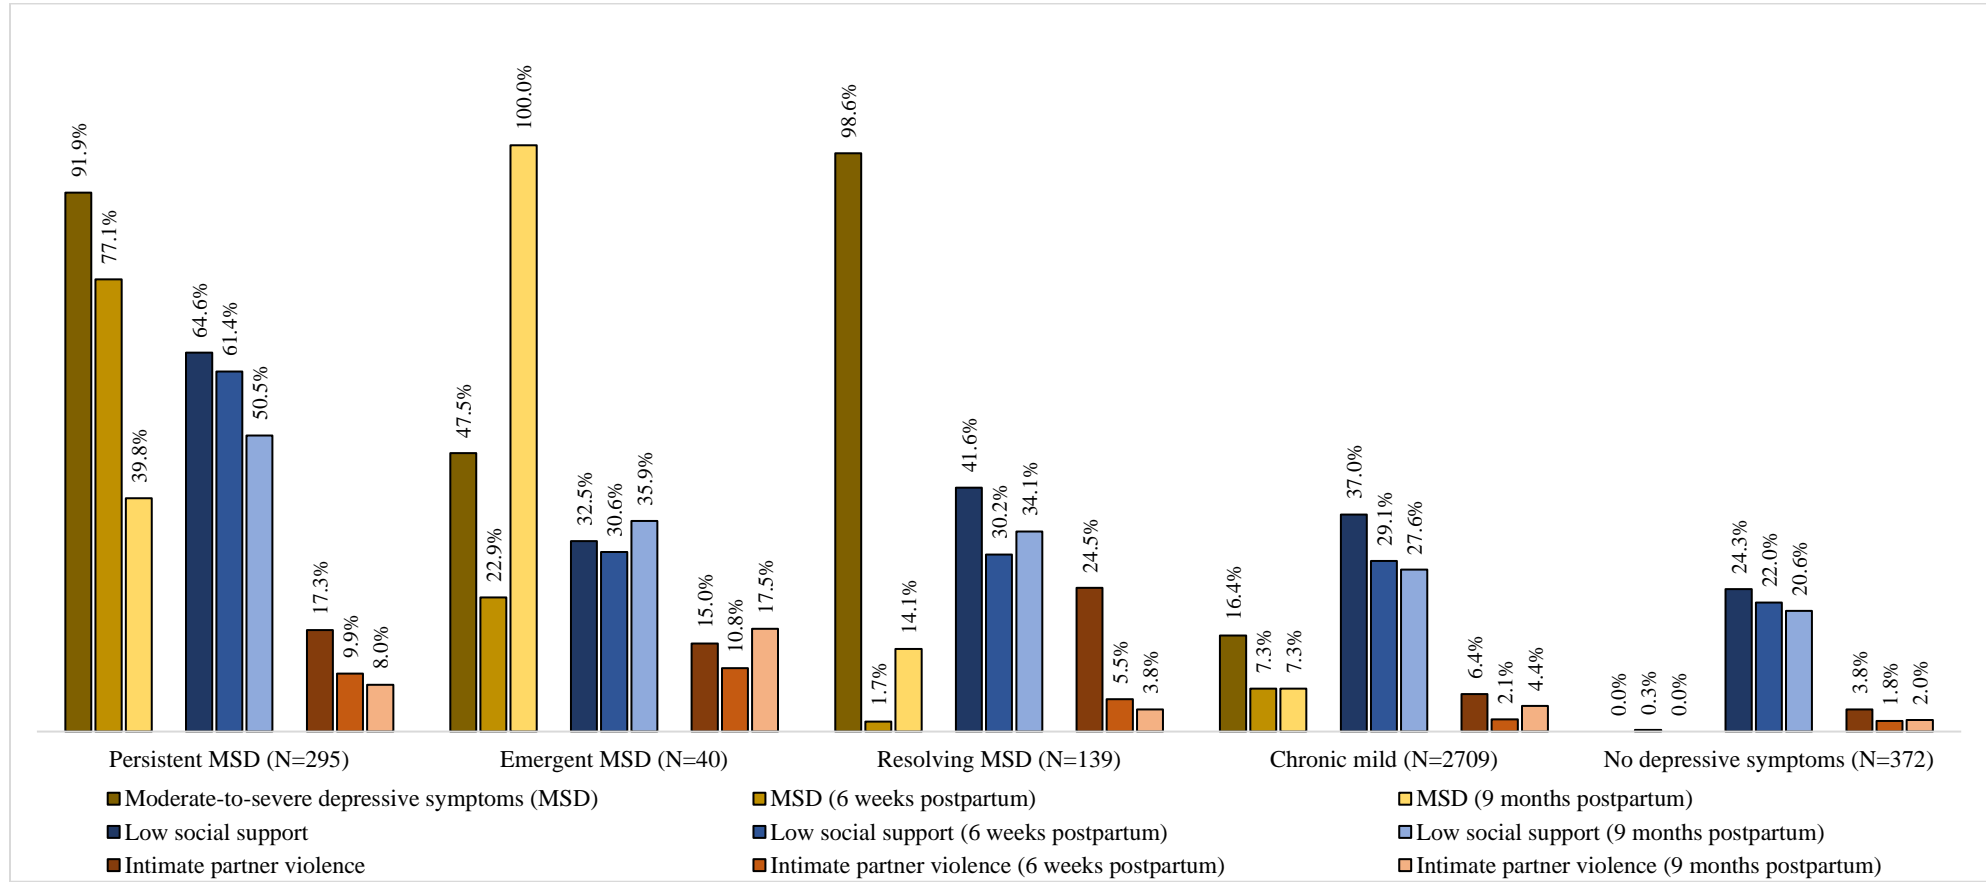

|                        | Persistent MSD |            |            | Emergent MSD |            |            | Resolving MSD |            |            | Chronic mild |            |            | No depressive symptoms |            |          |
|------------------------|----------------|------------|------------|--------------|------------|------------|---------------|------------|------------|--------------|------------|------------|------------------------|------------|----------|
|                        | Median (IQR)   |            |            | Median (IQR) |            |            | Median (IQR)  |            |            | Median (IQR) |            |            | Median (IQR)           |            |          |
| CESD-10 Scores         | Preg.          | 6 weeks    | 9 months   | Preg.        | 6 weeks    | 9 months   | Preg.         | 6 weeks    | 9 months   | Preg.        | 6 weeks    | 9 months   | Preg.                  | 6 weeks    | 9 months |
| Among all members      | 14 (12-17)     | 12 (10-16) | 8 (5-11)   | 9 (3-12)     | 3 (0-9)    | 22 (20-27) | 19 (17-22)    | 2 (0-5)    | 3 (0-7)    | 5 (3-8)      | 4 (3-6)    | 3 (2-6)    | 0 (0-1)                | 0 (0-1)    | 0 (0-0)  |
| Among members with MSD | 14 (12-18)     | 13 (12-17) | 12 (11-14) | 12 (11-14)   | 13 (10-18) | 22 (20-27) | 19 (17-22)    | 11 (10-12) | 11 (10-13) | 11 (10-12)   | 11 (10-13) | 11 (10-13) | 0 (0-0)                | 10 (10-10) | 0 (0-0)  |
